# Supplementary material
Source: PubMed Central journal article supplement (PMC8661016)
Supplement: mmc1.pdf [file mmc1.pdf]

**Mitophagy Mediates Metabolic Reprogramming of Induced Pluripotent Stem Cells  
Undergoing Endothelial Differentiation**

Sarah Krantz<sup>1</sup>, Young-Mee Kim<sup>1,2,3\*</sup>, Shubhi Srivastava<sup>1</sup>, Joseph W. Leasure<sup>1</sup>, Peter T. Toth<sup>1,4</sup>, Glenn Marsboom<sup>1</sup>, and Jalees Rehman<sup>1,2, 3\*</sup>

<sup>1</sup>Department of Pharmacology and Regenerative Medicine, University of Illinois, College of Medicine, Chicago, IL 60612

<sup>2</sup>Division of Cardiology, Department of Medicine, University of Illinois, College of Medicine, Chicago, IL 60612

<sup>3</sup>University of Illinois Cancer Center, Chicago, IL 60612

<sup>4</sup>Research Resources Center, University of Illinois at Chicago, Chicago, IL 60612

**A**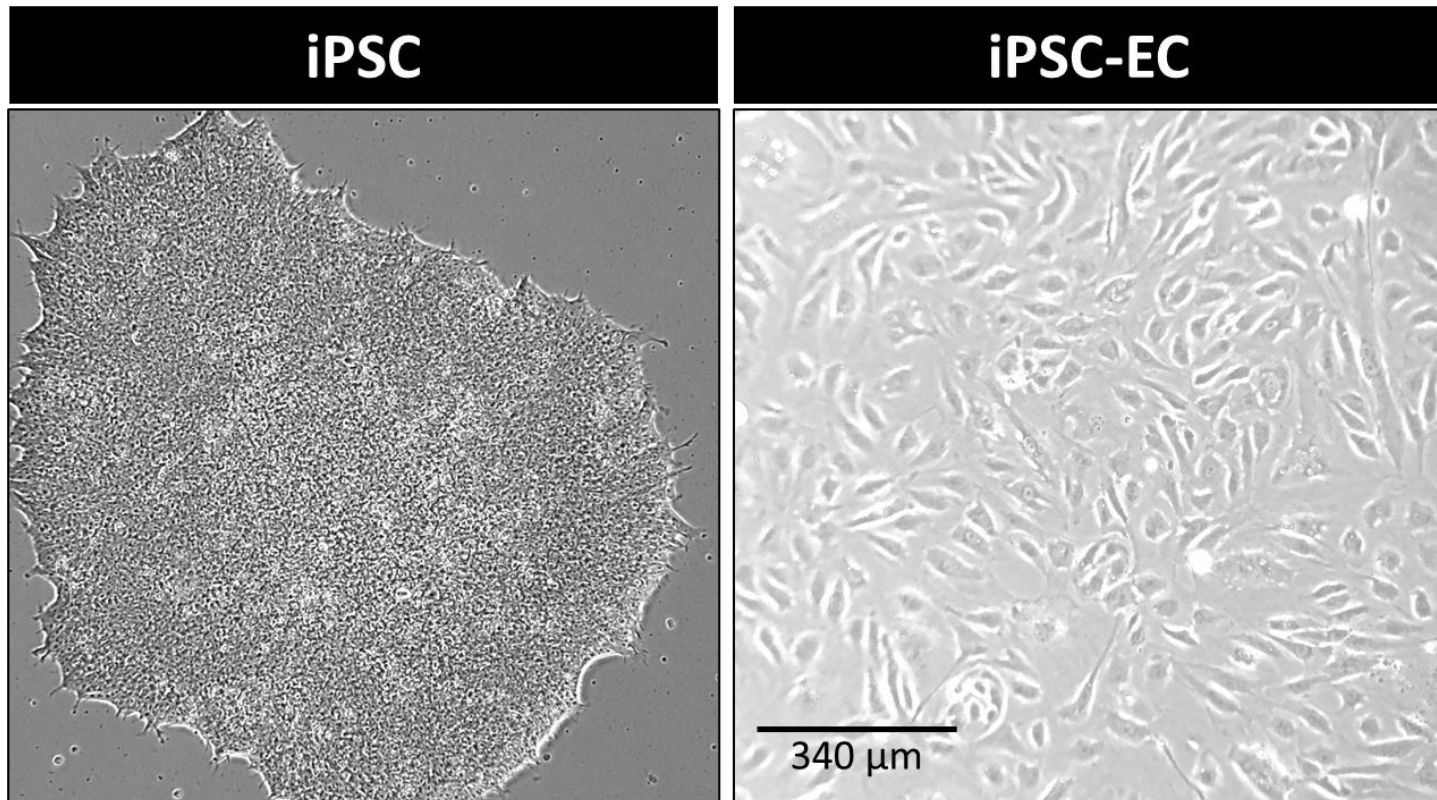**B**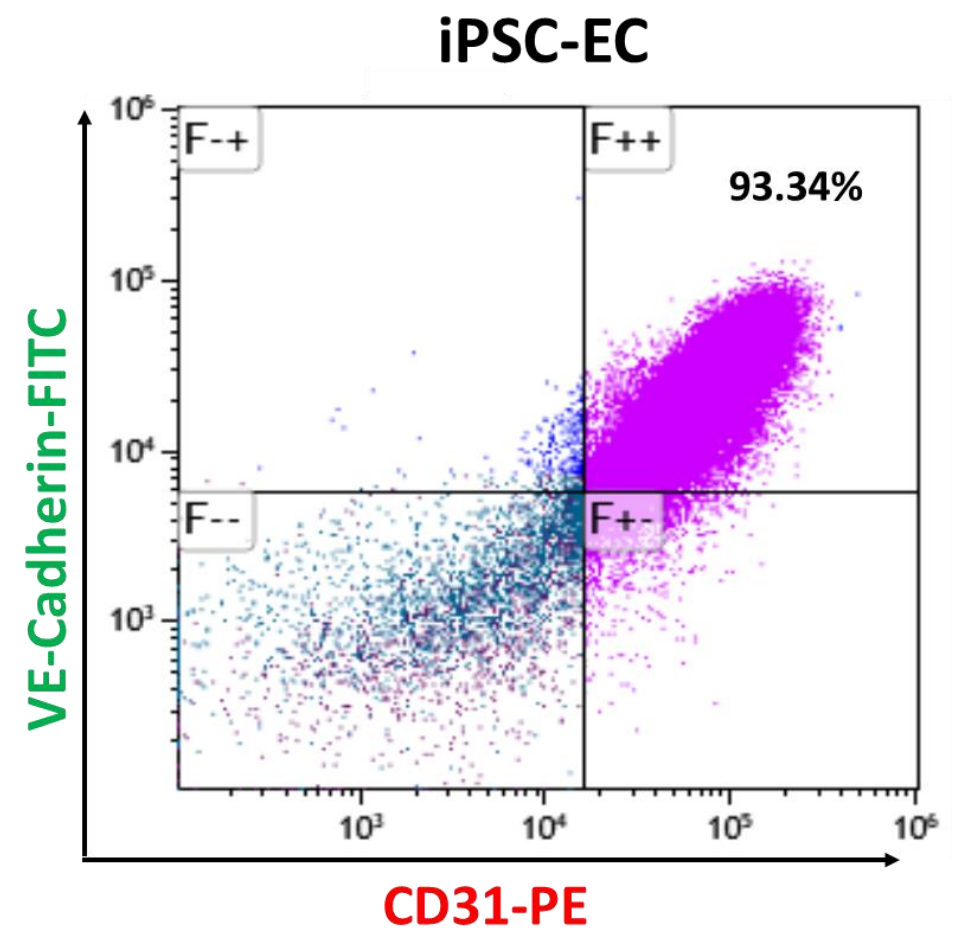**C**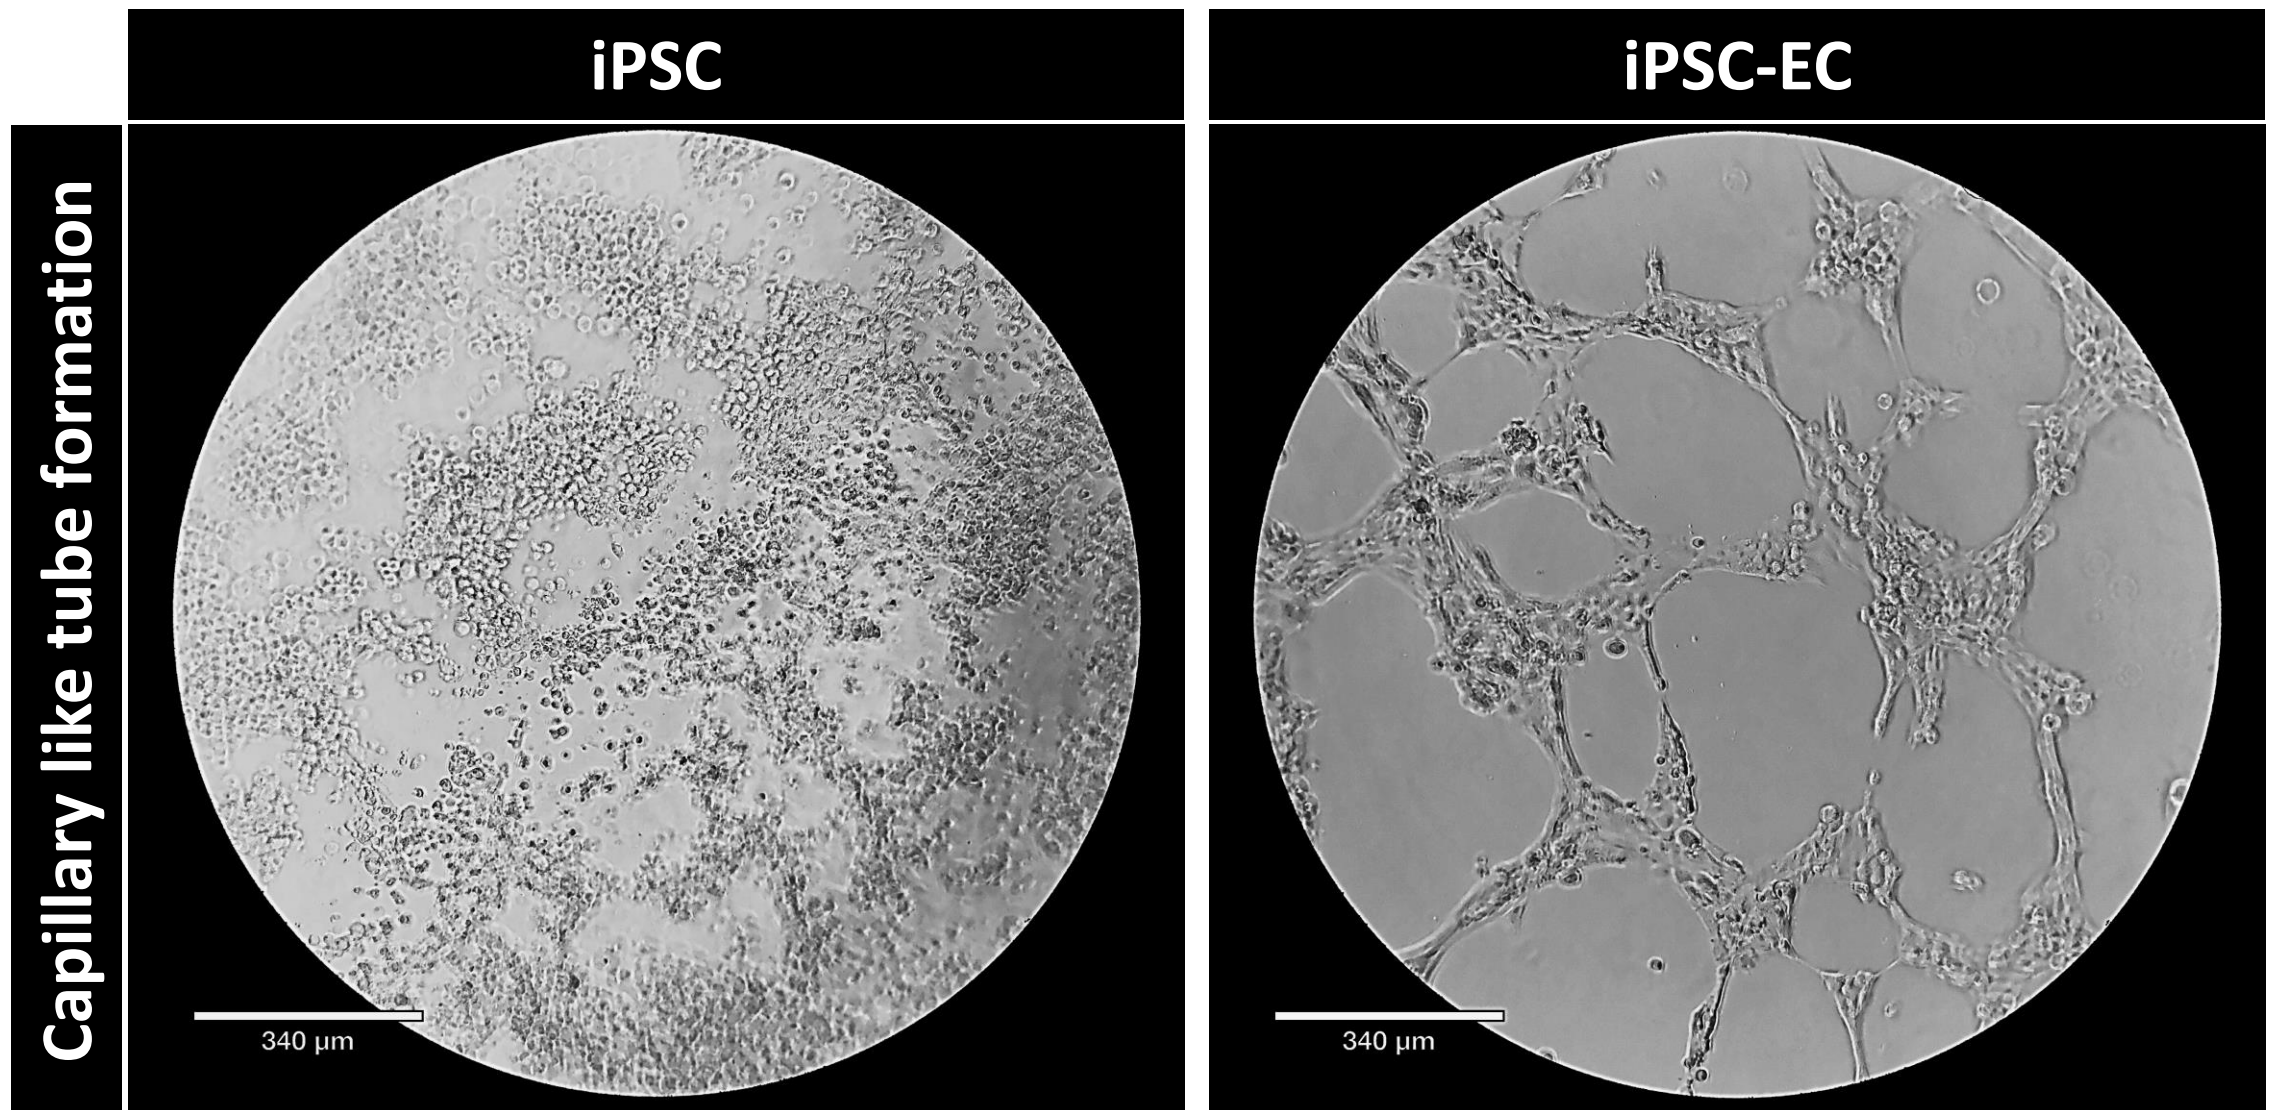**D**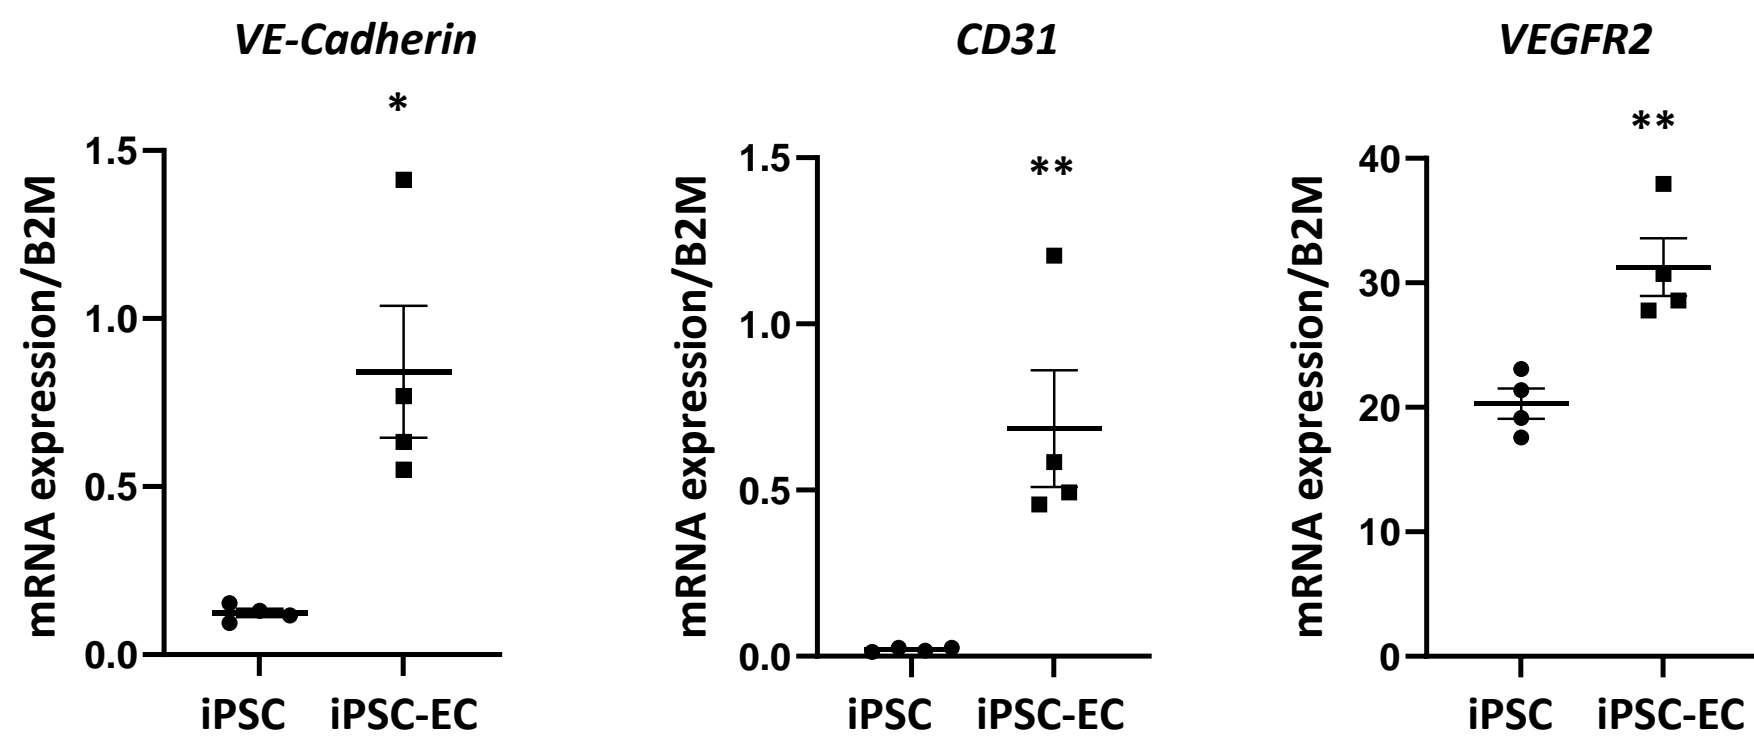

**Supplementary Figure 1. iPSC-ECs exhibit endothelial characteristics.** **(A)** Brightfield images of the cobblestone morphology of iPSC-ECs on 0.2% gelatin. Scale bar = 340  $\mu\text{m}$ . **(B)** Flow cytometry of iPSC-ECs at passage 3 which shows that 93% of iPSC-ECs remain double positive for the endothelial markers CD31 and VE-Cadherin after passaging (passage 3). **(C)** Brightfield images of capillary-like tube formation of iPSCs and iPSC-ECs. Cells were plated on growth factor reduced Matrigel and imaged to visualize tubes after 4 hours. iPSC-ECs show the formation of capillary-like structures indicative of endothelial cells. Scale bar = 340  $\mu\text{m}$ . **(D)** mRNA levels of *VE-Cadherin*, *CD31*, and *VEGFR2* were evaluated in iPSCs and VE-Cadherin sorted cells (iPSC-ECs) by RT-qPCR. B2M ( $\beta$ 2-Microglobulin) was used as housekeeping gene. iPSC-ECs show an increase in endothelial markers. Mean  $\pm$  SEM, n=4 with \*p<0.05 and \*\*p<0.01.

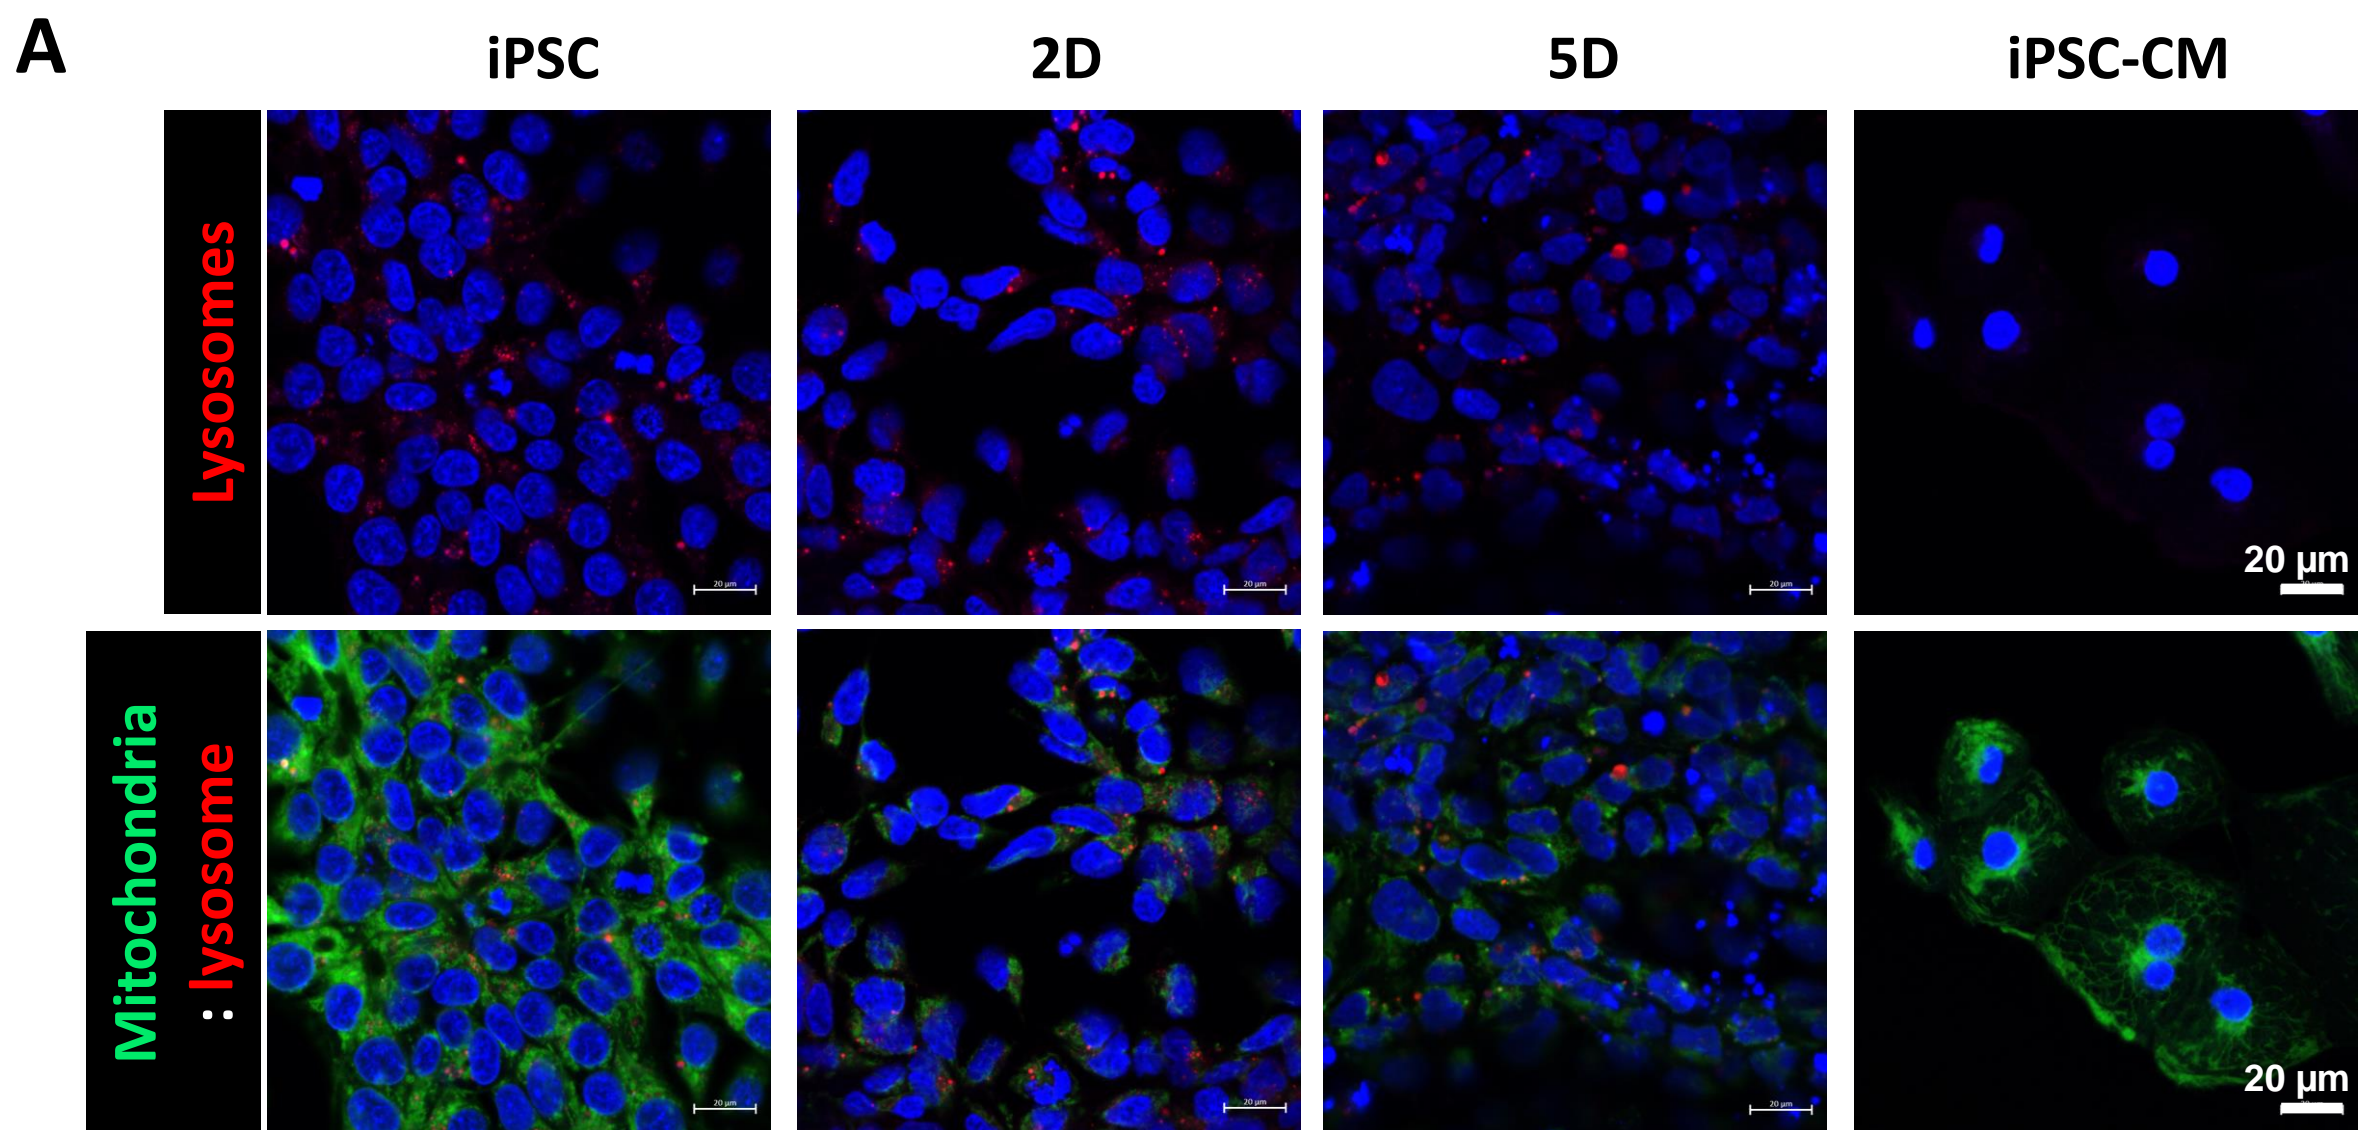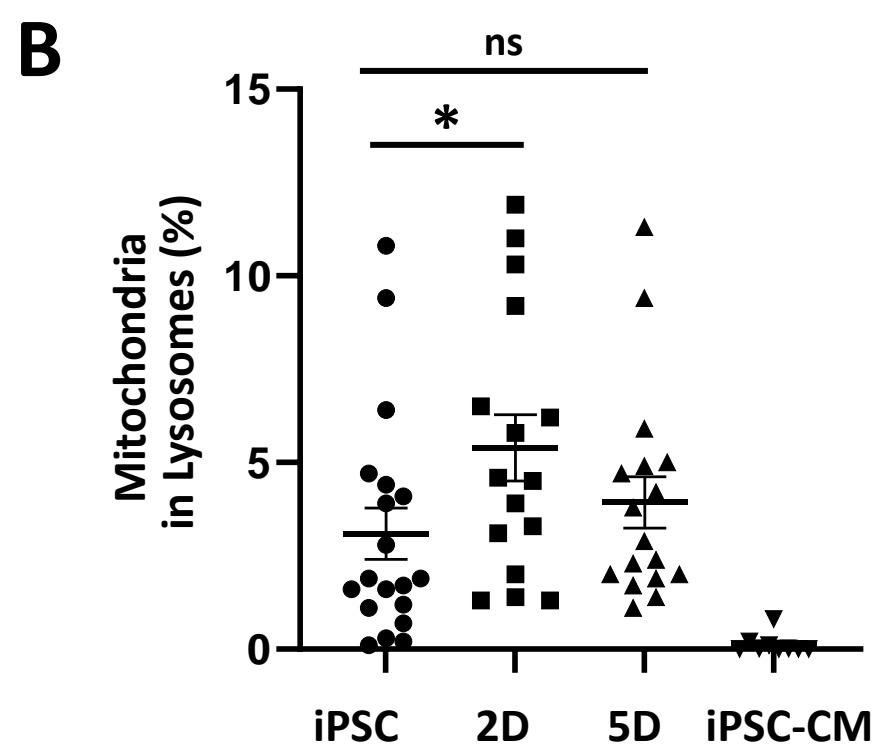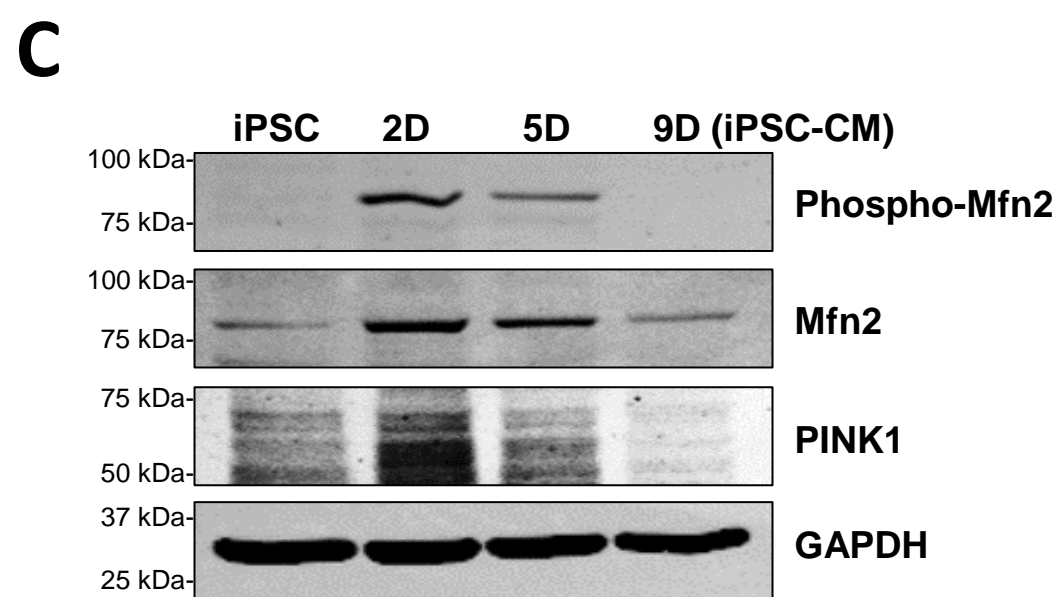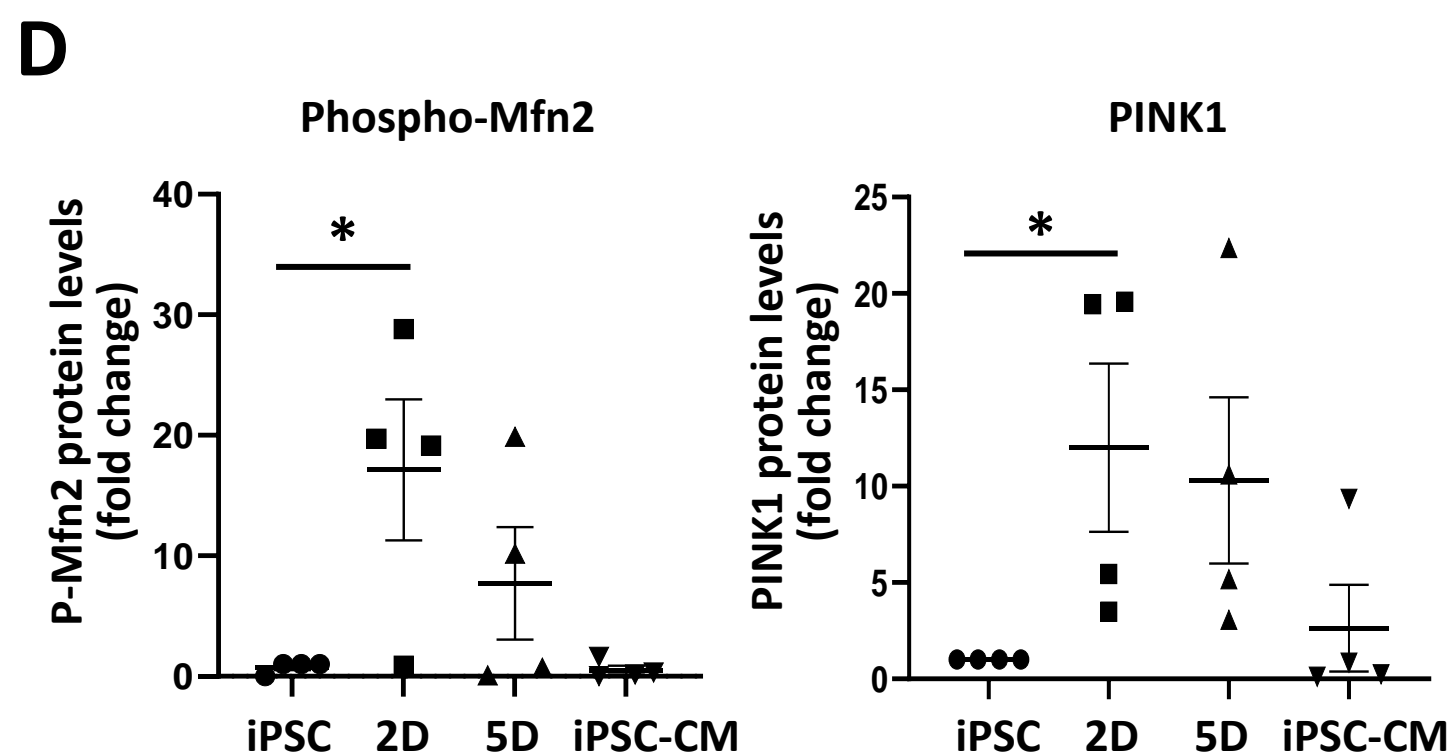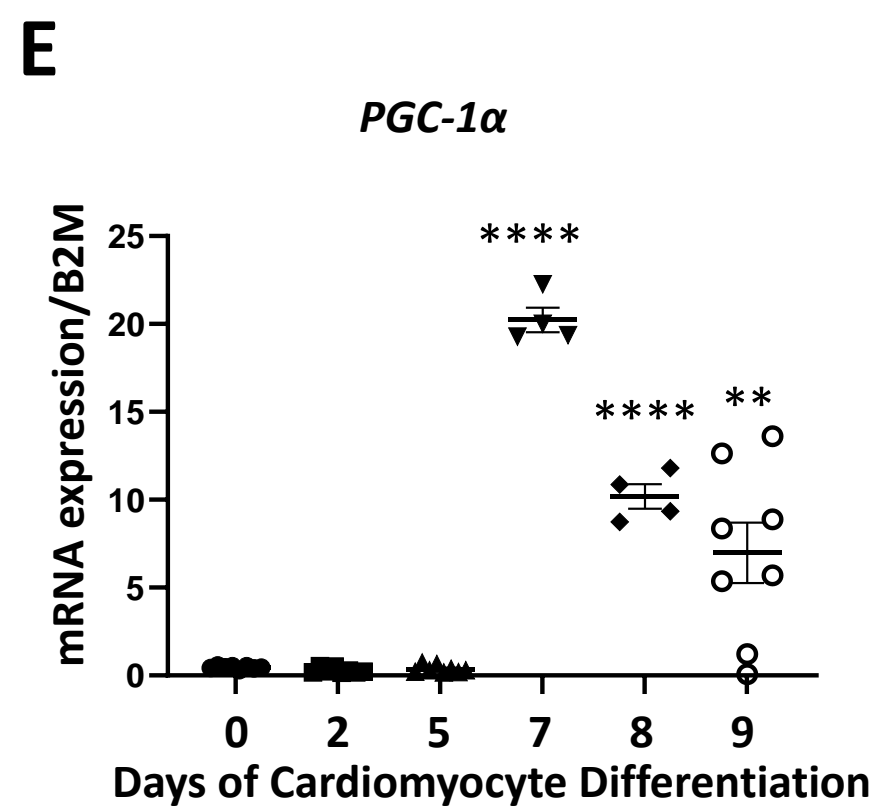

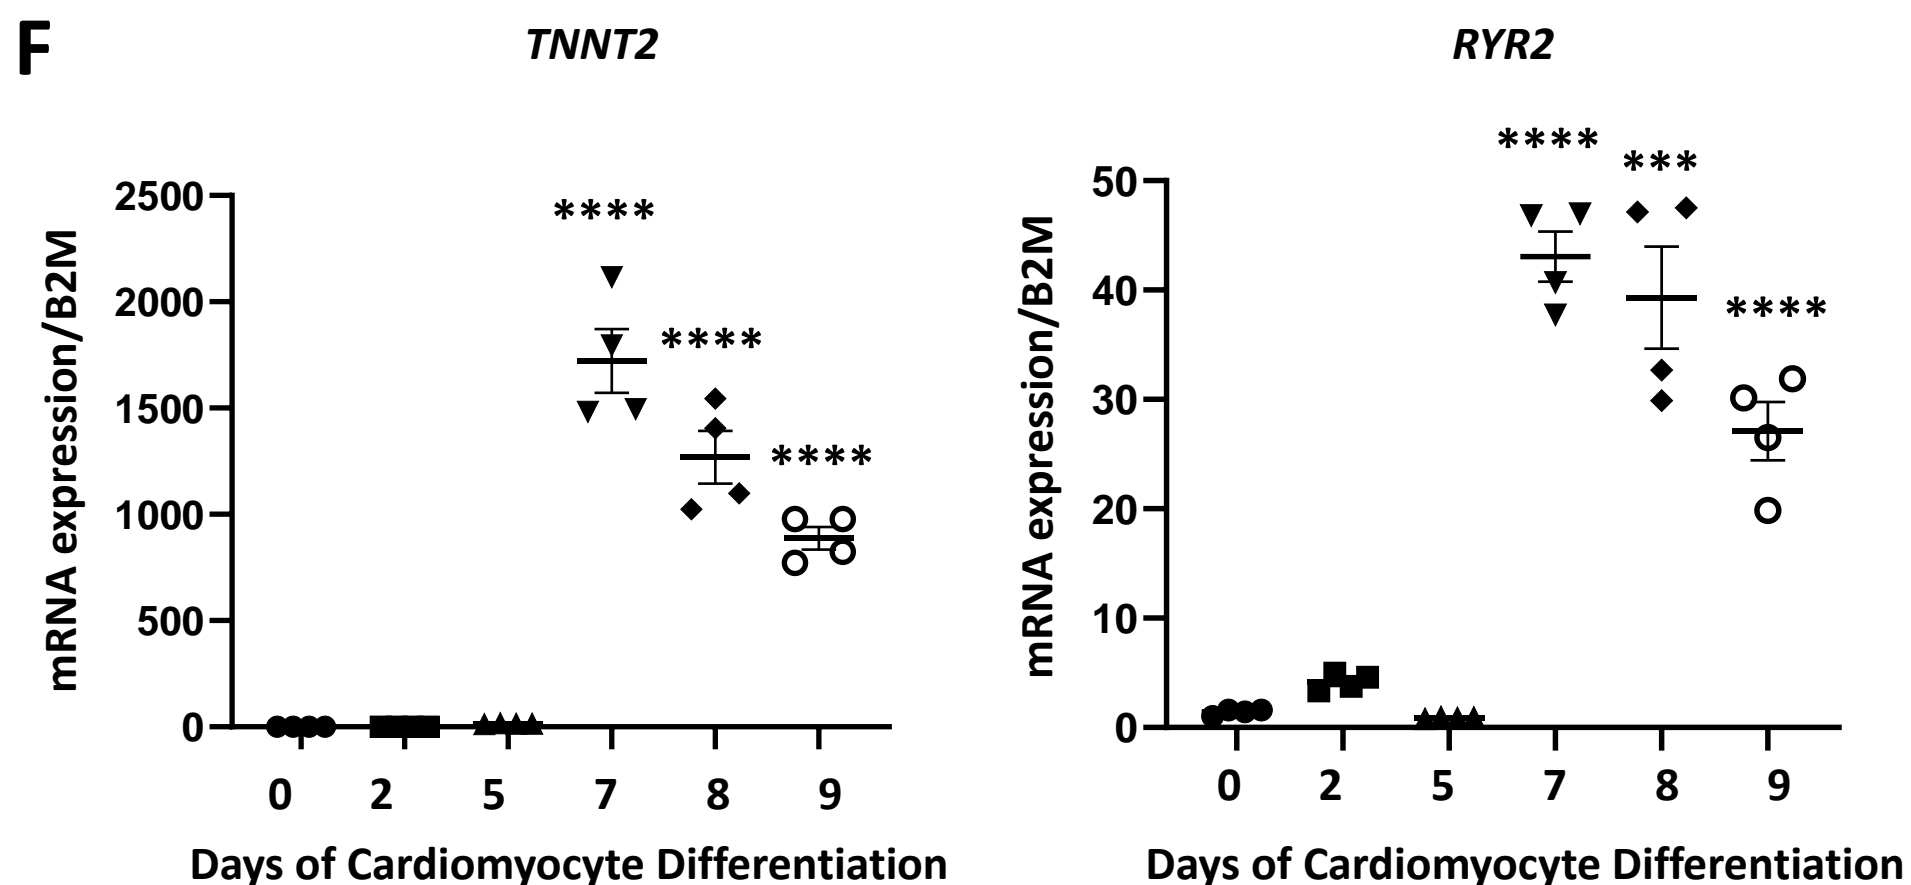

**Supplementary Figure 2. Mitophagy is followed by mitochondrial biogenesis during cardiomyocyte differentiation.** (A) Live cells were stained with MitoTracker (mitochondria, green), LysoTracker (lysosomes, red), and Hoechst 33342 (nuclei, blue) and imaged at specified timepoints during cardiomyocyte differentiation with confocal microscopy. Scale bar= 20  $\mu$ m. iPSC-CM indicates 9 day differentiated cardiomyocyte (CM) cells. (B) Quantification of (A) indicating the percent of overall mitochondria within lysosomes. Mitophagy is increased on day 2 of cardiomyocyte differentiation. Mean  $\pm$  SEM with \* $p$ <0.05. (C) Cells were lysed at different stages of cardiomyocyte differentiation. Western blots show Ser443 Mitofusin 2 phosphorylation, overall Mfn2 levels, PINK1 levels, and GAPDH as loading control. Mitophagy markers are increased on day 2 of cardiomyocyte differentiation. (D) Quantification of (C) which shows a higher level of phosphorylated Mfn2 and PINK1 on day 2 of cardiac differentiation. Mean  $\pm$  SEM,  $n$ =4 with \* $p$ <0.05. (E) mRNA levels of *PGC-1 $\alpha$*  were evaluated in differentiating cardiomyocytes by RT-qPCR. The master regulator of mitochondrial biogenesis is increased on days 7, 8, and 9 of differentiation, after mitophagy has occurred. B2M was used as housekeeping control. Mean  $\pm$  SEM with \*\* $p$ <0.01 and \*\*\*\* $p$ <0.0001. (F) mRNA levels of the cardiac markers *TNNT2* and *RYR2* were evaluated in differentiating cardiomyocytes by RT-qPCR. These markers of cardiomyocytes increased in days 7, 8, and 9 indicating that these cells exhibit cardiomyocyte characteristics. B2M ( $\beta$ 2-Microglobulin) was used as housekeeping gene. Mean  $\pm$  SEM,  $n$ =4 with \*\*\*\* $p$ <0.0001.

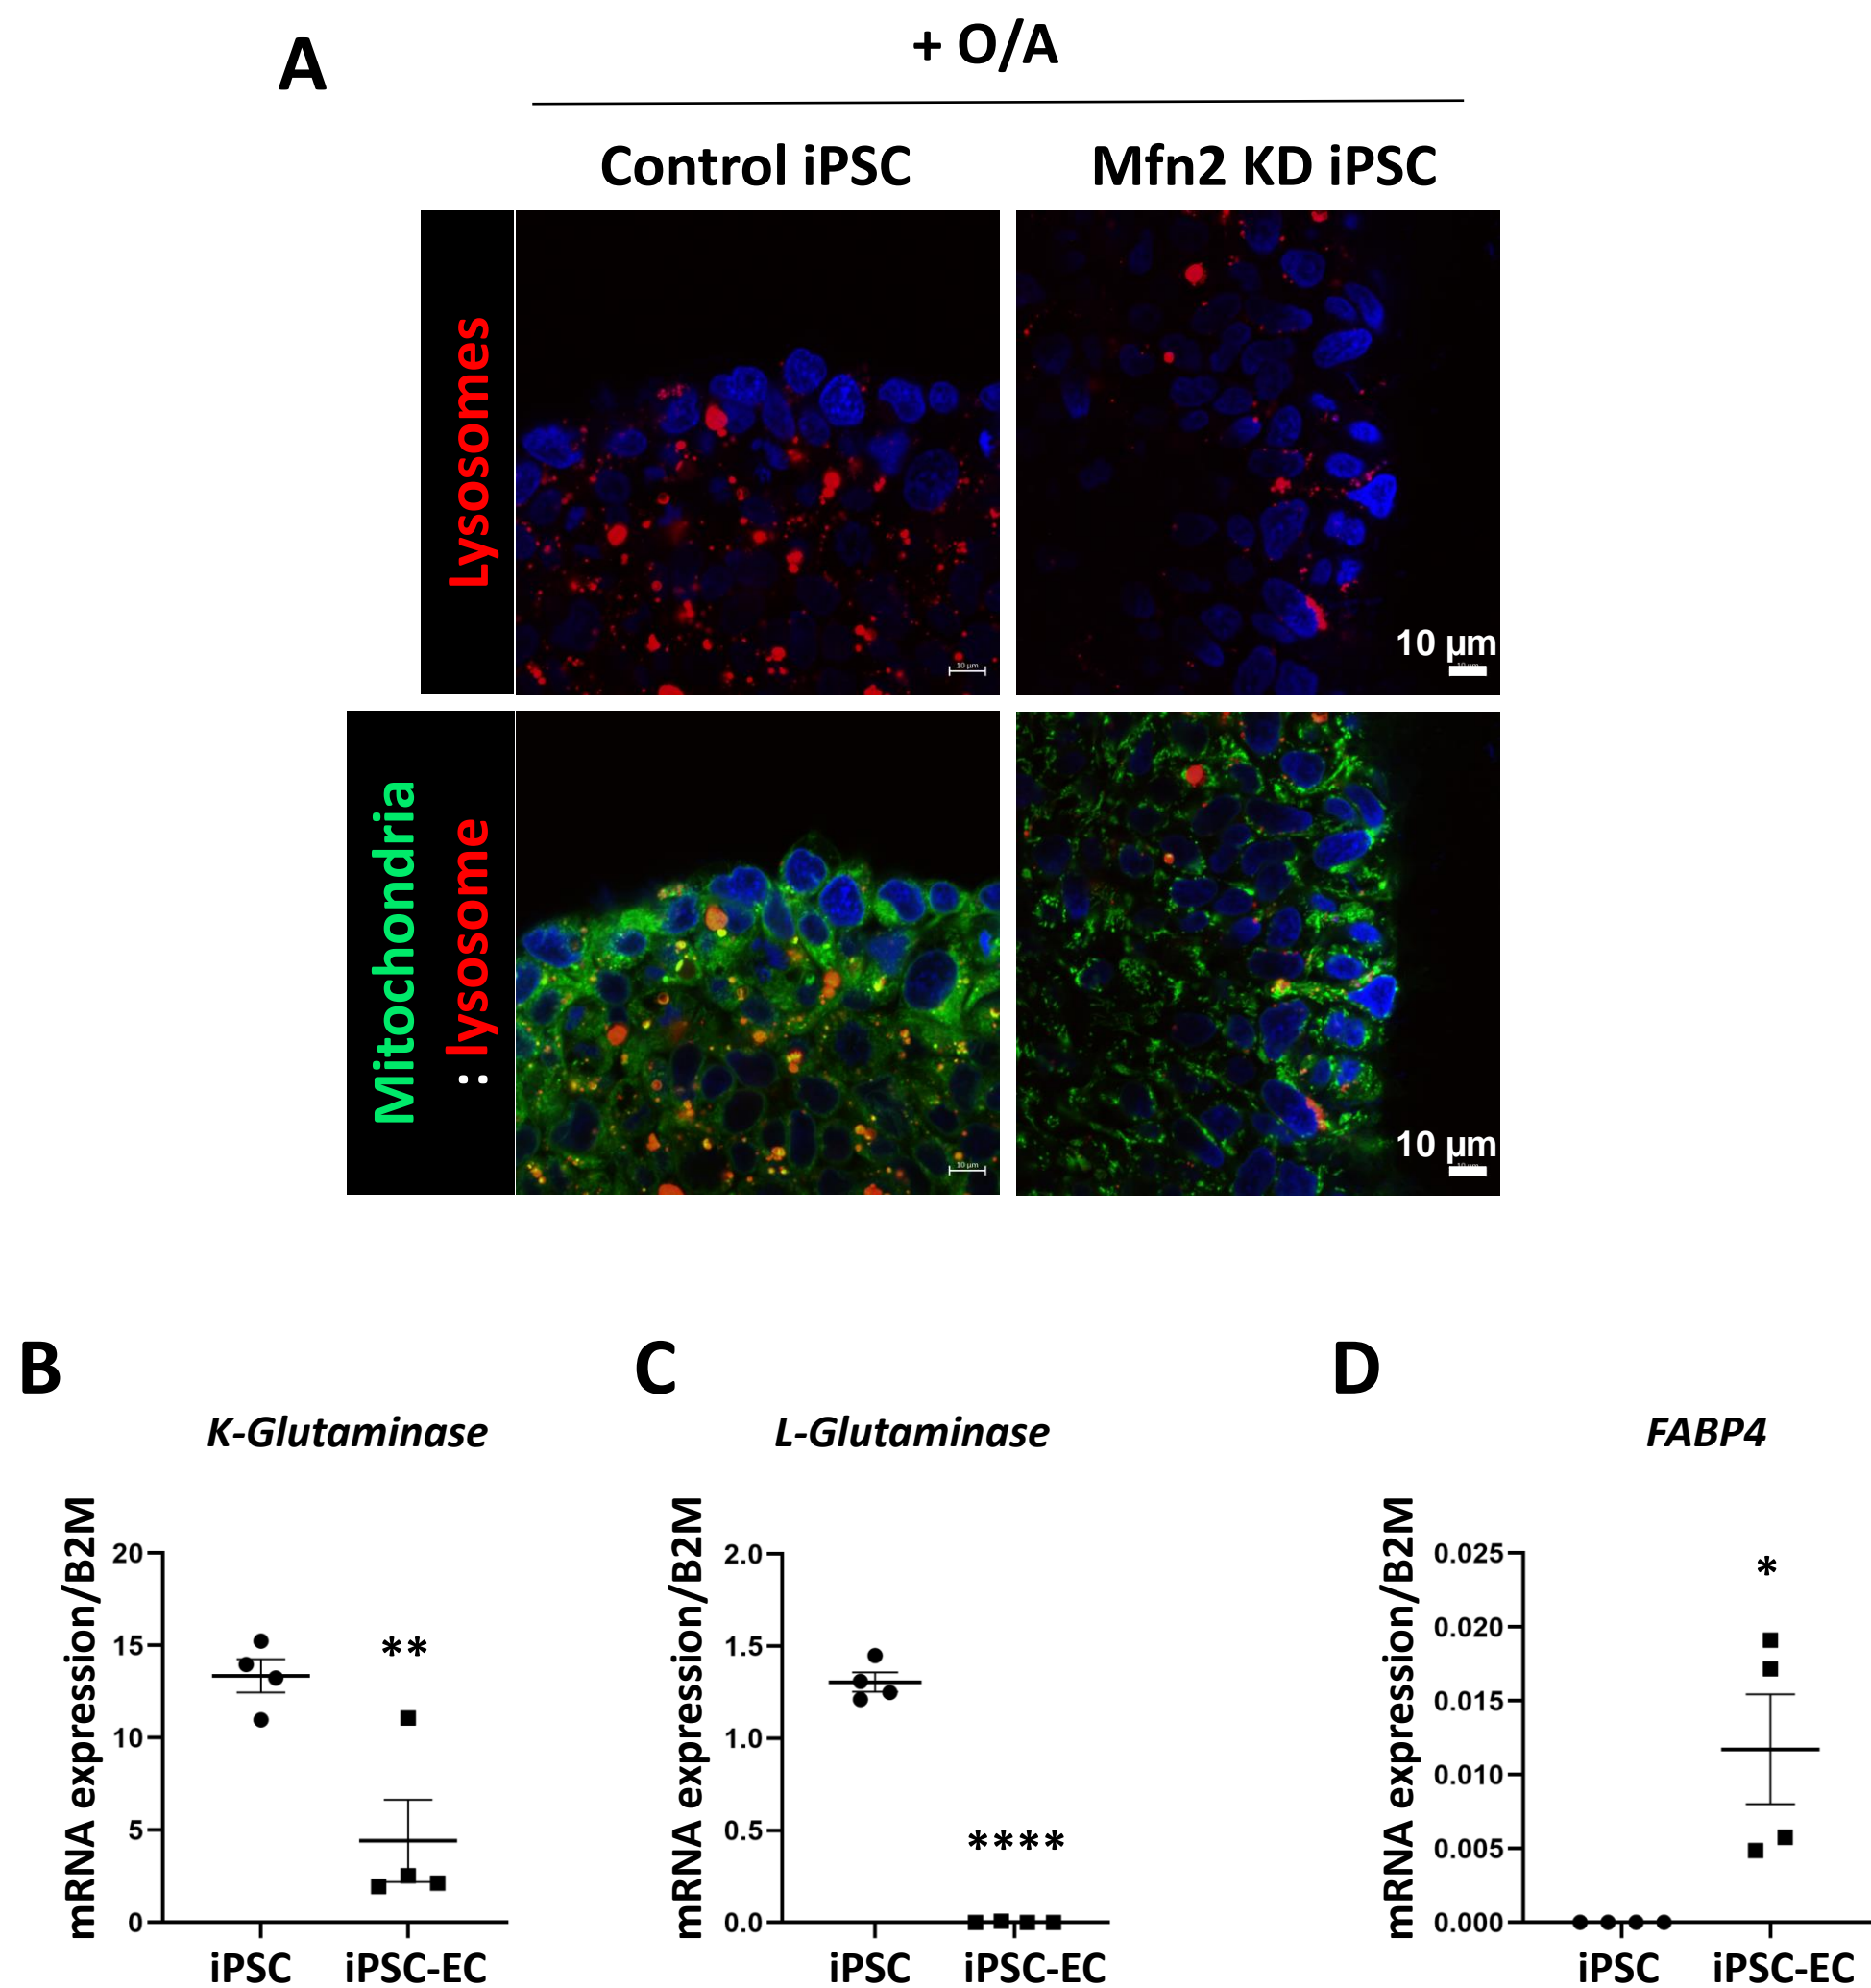

**Supplementary Figure 3. Alternate iPSC cell line also shows metabolic reprogramming.** (A) Live cells with and without Mitofusin 2 shRNA knockdown were treated with the mitophagy inducers oligomycin (10  $\mu$ M) and antimycin (5  $\mu$ M) (O/A) for 3 hours and stained with MitoTracker (mitochondria, green), LysoTracker (lysosomes, red), and Hoechst 33342 (nuclei, blue). Cells were imaged with confocal microscopy. Mitophagy decreases after Mitofusin 2 knockdown. Scale bar = 10  $\mu$ m. (B-D) mRNA levels of (B) *K-Glutaminase*, (C) *L-Glutaminase*, and (D) *Fatty Acid Binding Protein 4 (FABP4)* were evaluated in an alternative cell line of iPSCs (C2 cell line) and iPSC-ECs by RT-qPCR. Results are consistent with 273 cell line from main Figure 3. B2M ( $\beta$ 2-Microglobulin) was used as a housekeeping gene. Mean  $\pm$  SEM, n=4 with \*p<0.05, \*\*p<0.01, and \*\*\*\*p<0.0001.
